# Supplementary material
Source: Springer Nature journal article supplement (https://www.springermedizin.de/resource/supplementary/12955_2013_1315_MOESM1_ESM.pdf/9559566)
Supplement: MOESM1 [file 9559566]

429 patients received a diagnosis of non-small-cell lung cancer (NSCLC)

67 patients died

3 months after the diagnosis process

362 patients were eligible

132 patients did not return the SF-36

132 patients did not return the QLQ C-30

230 completed the SF-36

230 completed the QLQ C-30

Status at May 1, 2010

169 patients had died

61 were still alive

178 patients had died

52 were still alive
